# Supplementary material for: The impact of the COVID-19 pandemic on the research activity and working experience of clinical academics, with a focus on gender and ethnicity: a qualitative study in the UK
Source: HighWire-hosted journal article supplement (doi:10.1136/bmjopen-2021-057655), 2022-06-01
Supplement: bmjopen-2021-057655supp001_data_supplement.pdf [file bmjopen-2021-057655supp001_data_supplement.pdf]

## Appendix 1: Interview and example audio diary prompts for participants during COVID-19

| <b>Example interview stems for participants during COVID-19</b>                                                                                                                                                                                                                                                                                                                                                                                                                                                                                                                                                                                                                                                                                                                                                                                                                                                                                                                                                                                                                                                                                                                                                                                                                                                                                                                                                                                                                                                                                                                                                                                                                                                                                                                                                                                                                                                                                                                                                                                                                                                                                                                                                      |
|----------------------------------------------------------------------------------------------------------------------------------------------------------------------------------------------------------------------------------------------------------------------------------------------------------------------------------------------------------------------------------------------------------------------------------------------------------------------------------------------------------------------------------------------------------------------------------------------------------------------------------------------------------------------------------------------------------------------------------------------------------------------------------------------------------------------------------------------------------------------------------------------------------------------------------------------------------------------------------------------------------------------------------------------------------------------------------------------------------------------------------------------------------------------------------------------------------------------------------------------------------------------------------------------------------------------------------------------------------------------------------------------------------------------------------------------------------------------------------------------------------------------------------------------------------------------------------------------------------------------------------------------------------------------------------------------------------------------------------------------------------------------------------------------------------------------------------------------------------------------------------------------------------------------------------------------------------------------------------------------------------------------------------------------------------------------------------------------------------------------------------------------------------------------------------------------------------------------|
| <p><i>Semi-structured approach thus will be guided by participants.</i></p> <ol style="list-style-type: none"> <li><b>1. Introductions</b></li> <li><b>2. Please describe your role and career path to date - both clinical and academic</b></li> <li><b>3. What are your experiences of clinical academia?</b></li> <li><b>4. What factors impacted upon your decision to pursue (or not pursue) a career in clinical academia?</b> <ul style="list-style-type: none"> <li>• <i>What factors make clinical academia an attractive career?</i></li> </ul> </li> <li><b>5. What has your experience with awards/ funding been like? (if any)</b> <ul style="list-style-type: none"> <li>• <i>Application process? (facilitators/barriers)</i></li> <li>• <i>Support through process</i></li> <li>• <i>Why did/didn't continue? (e.g. after PhD why didn't do lectureship?)</i></li> <li>• <i>If not applied, why not?</i></li> <li>• <i>Did this experience influence your choice in career pathway?</i></li> </ul> </li> <li><b>6. What barriers and enablers have you faced within clinical academia?</b> <ul style="list-style-type: none"> <li>• <i>What made you continue/not continue?</i></li> <li>• <i>What stops people returning to clinical academia?</i></li> <li>• <i>How do you negotiate the 2 career paths?</i></li> <li>• <i>What goes wrong in institutions that funders can help with?</i></li> <li>• <i>What worked well/ less well with other funders you have experienced?</i></li> <li>• <i>Impact of the COVID-19 pandemic</i></li> </ul> </li> <li><b>7. What could be done to improve equal representation within clinical academia?</b></li> <li><b>8. Describe any interventions to promote access to clinical academia or reduce discrimination that you have experienced.</b> <ul style="list-style-type: none"> <li>• <i>What worked?</i></li> <li>• <i>Given your context, what would you recommend?</i></li> </ul> </li> <li><b>9. What existing or new interventions could help to reduce attrition in clinical academic careers?</b></li> <li><b>10. How can organisations support trainees and clinical academics in their career decisions and academic pathways?</b></li> </ol> |
| <b>Example audio diary prompts for participants during COVID-19</b>                                                                                                                                                                                                                                                                                                                                                                                                                                                                                                                                                                                                                                                                                                                                                                                                                                                                                                                                                                                                                                                                                                                                                                                                                                                                                                                                                                                                                                                                                                                                                                                                                                                                                                                                                                                                                                                                                                                                                                                                                                                                                                                                                  |
| <p>Participants were able to reflect on all prompts any situation pertaining to Clinical Academia that they wished. Prompts were broad and participants were informed of the interest in protected characteristics.</p>                                                                                                                                                                                                                                                                                                                                                                                                                                                                                                                                                                                                                                                                                                                                                                                                                                                                                                                                                                                                                                                                                                                                                                                                                                                                                                                                                                                                                                                                                                                                                                                                                                                                                                                                                                                                                                                                                                                                                                                              |

|                                                                              |                                                                                                             |                                                                                                                          |
|------------------------------------------------------------------------------|-------------------------------------------------------------------------------------------------------------|--------------------------------------------------------------------------------------------------------------------------|
| How has COVID-19 impacted upon your work as a clinical academic?             | What have you heard about funding (opportunities, threats, remit etc) post COVID-19?                        | Has COVID-19 had a detrimental impact on or changed your career plans?                                                   |
| How has the expectation of the impact of COVID-19 differed from the reality? | How have your protected characteristics impacted upon your experience of clinical academia during COVID-19? | BAME participants: Has the emerging data on the enhanced risk to the BAME workforce from COVID-19 had any impact on you? |
| Has COVID-19 had a detrimental impact on or changed your research?           | What barriers and enablers have you faced during COVID-19?                                                  | Parents/ carers: How have your responsibilities impacted upon your ability to work?                                      |
